# Supplementary material for: Activation of PTHrP-cAMP-CREB1 signaling following p53 loss is essential for osteosarcoma initiation and maintenance
Source: eLife journal article supplement (doi:10.7554/elife.13446), 2016-04-09

Figure 6 - figure supplement 1 (Walia et al)

A Upregulated Creb1 signatures in OS subtypes

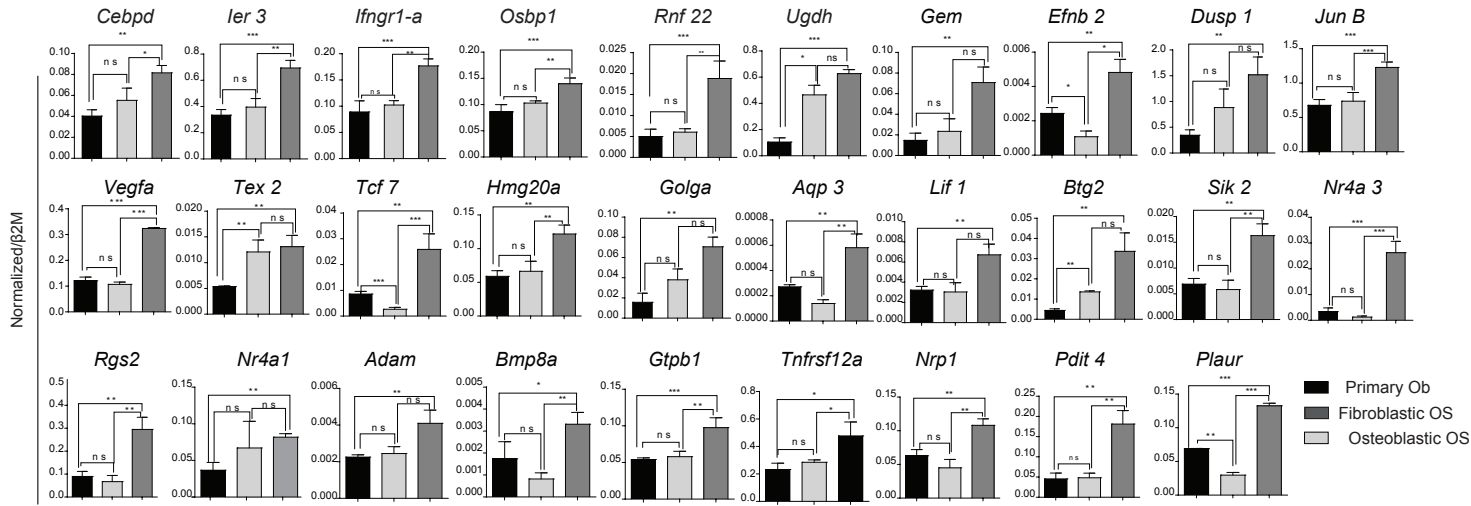

B Downregulated Creb1 signatures in OS subtypes

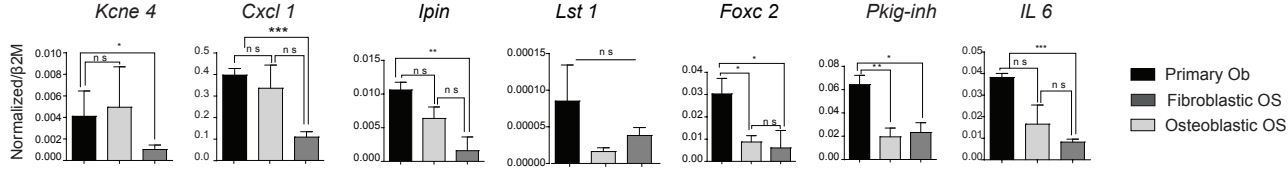

C Creb1 signatures not altered in OS subtypes

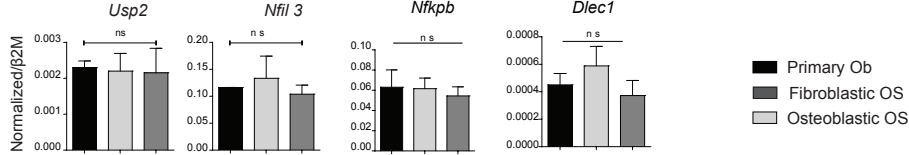

D

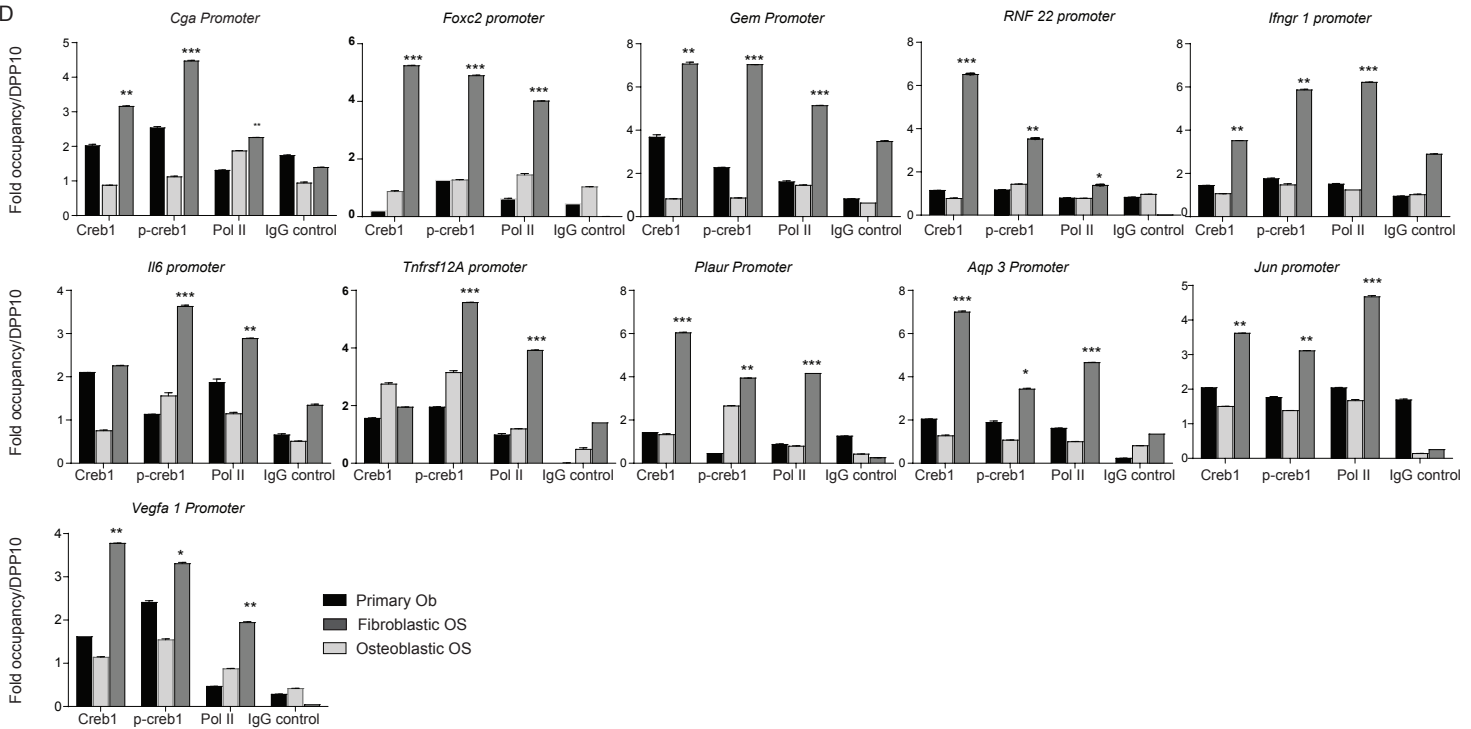

Supplement: supp [file elife-13446-supp-v1.zip]
