# Supplementary material for: Activation of PTHrP-cAMP-CREB1 signaling following p53 loss is essential for osteosarcoma initiation and maintenance
Source: eLife journal article supplement (doi:10.7554/elife.13446), 2016-04-09
Supplement: supp [file elife-13446-supp-v1.zip]

| Tumor type   | Mutation class | Category   | Num genes in sample | Unique official symbols matched | Number genes in cAMP pathway | p value    | Genes                                                                                                                                                                                                                                                | Ref    | Source                                | Number genes in cGMP pathway | p value  | Number genes in cAMP pathway (and not cGMP pathway) | p value  | Genes                                                                                                                                                                           | Number genes in cGMP pathway (and not cAMP pathway) | p value  | Genes                                                                  | Number genes common to cAMP and cGMP pathway | p value   | Genes                                                   |
|--------------|----------------|------------|---------------------|---------------------------------|------------------------------|------------|------------------------------------------------------------------------------------------------------------------------------------------------------------------------------------------------------------------------------------------------------|--------|---------------------------------------|------------------------------|----------|-----------------------------------------------------|----------|---------------------------------------------------------------------------------------------------------------------------------------------------------------------------------|-----------------------------------------------------|----------|------------------------------------------------------------------------|----------------------------------------------|-----------|---------------------------------------------------------|
| Osteosarcoma | SNV            | All        | 1707                | 1664                            | 41                           | 3.16E-22   | ADCY1 ADRA1D ADRA2B AKAP1 AKAP3 AKAP5 AKAP6 ANXA1 ATP1A1 ATP2B1 CACNA1D CACNA1F CACNA1S CFTR CNGB1 DRD2 F2R GIPR GNAI3 GRIA2 GRIN2A GRIN2B GRIN3A HCN4 PDE10A PDE2A PDE4B PDE4D PDE6B PIK3C2B PIK3CG PIK3R4 PIK3R6 PLCL1 PPP2R2B PPP2R3A PRKCA PRKCB | Chen   | validated SNVs table S3c              | 14                           | 2.89E-05 | 33                                                  | 2.14E-18 | SSTR5                                                                                                                                                                           | 6                                                   | 1.97E-02 | ATP2A1 BDKRB1 KCNMB1 MEF2C                                             | 8                                            | 2.86E-05  | ADCY1 ADRA1D ADRA2B CACNA1D CACNA1F CACNA1S CNGB1 PDE2A |
| Osteosarcoma | SNV            | non silent | 1506                | 1464                            | 35                           | 1.18E-18   | ADRA1D ADRA2B AKAP1 AKAP5 AKAP6 ANXA1 ATP1A1 ATP2B1 CACNA1D CACNA1F CACNA1S CNGB1 DRD2 F2R GIPR GNAI3 GRIA2 GRIN2A GRIN2B GRIN3A HCN4 PDE10A PDE2A PDE4B PDE4D PDE6B PIK3C2B PIK3CG PIK3R6 PLCL1 PPP2R2B PRKCA PRKCB                                 | Chen   | validated SNVs table S3c (non silent) | 13                           | 2.89E-05 | 28                                                  | 2.37E-15 | AKAP1 AKAP5 AKAP6 ANXA1 ATP1A1 ATP2B1 DRD2 F2R GIPR GNAI3 GRIA2 GRIN2A GRIN2B GRIN3A HCN4 PDE10A PDE4B PDE4D PDE6B PIK3C2B PIK3CG PIK3R6 PLCL1 PPP2R2B PRKCA PRKCB PTGER3 SSTR5 | 6                                                   | 1.04E-02 | ATP2A1 BDKRB1 KCNMB1 MEF2C                                             | 7                                            | 7.97E-05  | ADRA1D ADRA2B CACNA1D CACNA1F CACNA1S CNGB1 PDE2A       |
| Ewings       | SNV            | All        | 1724                | 1683                            | 26                           | 2.22E-09   | ADCY7 ADCY9 ADCYAP1R1 CACNA1D CACNA1S CCBL2 CNGB1 CREB5 GLP1R GRIA2 GRIN2A GRIN2B HCN4 NPY1R OXTR PIK3CG PRKCA PRKCB RYR2 SSTR1 TSHR                                                                                                                 | Triode | Table S2e: Tier1 SNVs                 | 12                           | 4.60E-04 | 20                                                  | 9.36E-08 | ADCYAP1R1 CCBL2 CNGA4 GLP1R GRIA2 GRIA4 GRIN2A GRIN2B GRIN3A HCN4 MLLT4 NPY1R OXTR PIK3CG PRKCA PRKCB RYR2 SLC9A1 SSTR1 TSHR                                                    | 6                                                   | 2.09E-02 | ATP2A1 BDKRB1 IRS1 MEF2A MYLK PDE3A                                    | 6                                            | 4.60E-04  | ADCY7 ADCY9 CACNA1D CACNA1S CNGB1 CREB5                 |
| Ewings       | SNV            | non silent | 1470                | 1430                            | 21                           | 1.6399E-07 | ADCY7 ADCY9 ADCYAP1R1 CACNA1D CACNA1S CCBL2 CNGB1 CREB5 GLP1R GRIA2 GRIN2A GRIN2B HCN4 NPY1R OXTR PIK3CG PRKCA PRKCB RYR2 SSTR1 TSHR                                                                                                                 | Triode | Table S2e: Tier1 SNVs (non silent)    | 12                           | 9.48E-05 | 15                                                  | 1.43E-05 | ADCYAP1R1 CCBL2 GLP1R GRIA2 GRIN2A GRIN2B HCN4 NPY1R OXTR PIK3CG PRKCA PRKCB RYR2 SSTR1 TSHR                                                                                    | 6                                                   | 9.21E-03 | ATP2A1 BDKRB1 IRS1 MEF2A MYLK PDE3A                                    | 6                                            | 1.20E-03  | ADCY7 ADCY9 CACNA1D CACNA1S CNGB1 CREB5                 |
| Breast       | SNV            | All        | 2734                | 2608                            | 33                           | 7.29E-10   | AKT1 BDNF BRAF BRD2 CACNA1F CCBL2 CHRM2 CNGA2 CNGA3 CNGA4 CREB5 EDNRA GLI3 GRIA4 GRIN2A GRIN3A JUN PPP1R12A PRKACG PRKCB RYR2 SOX9 ATP2B1 CACNA1D PIK3CG ROCK1 ROCK2 ADCY10 CREBBP GLP1R HCAR1 PDE10A RAF1 TNNI3                                     | Ellis  | Supplementary Table 5a: Tier1 SNVs    | 21                           | 8.90E-07 | 25                                                  | 1.94E-07 | ADCY10 ATP2B1 BDNF BRAF BRD2 CCBL2 CHRM2 CNGA2 CNGA3 CNGA4 CREBBP GLI3 GLP1R GRIA4 GRIN2A GRIN3A HCAR1 JUN PDE10A PIK3CG PRKACG PRKCB RYR2 SOX9                                 | 12                                                  | 2.96E-04 | ATP2A1 EDNRB GNA13 GTF2I ITPR3 MEF2D MYLK NPR2 PDE3A PDE5A PRKCE PRKG1 | 9                                            | 0.0001737 | ROCK2                                                   |

Figure 7 – Figure supplement 1
