# Supplementary figures and images for: Activation of PTHrP-cAMP-CREB1 signaling following p53 loss is essential for osteosarcoma initiation and maintenance
Source: eLife journal article supplement (doi:10.7554/elife.13446), 2016-04-09

Figure 2 - Figure Supplement 2

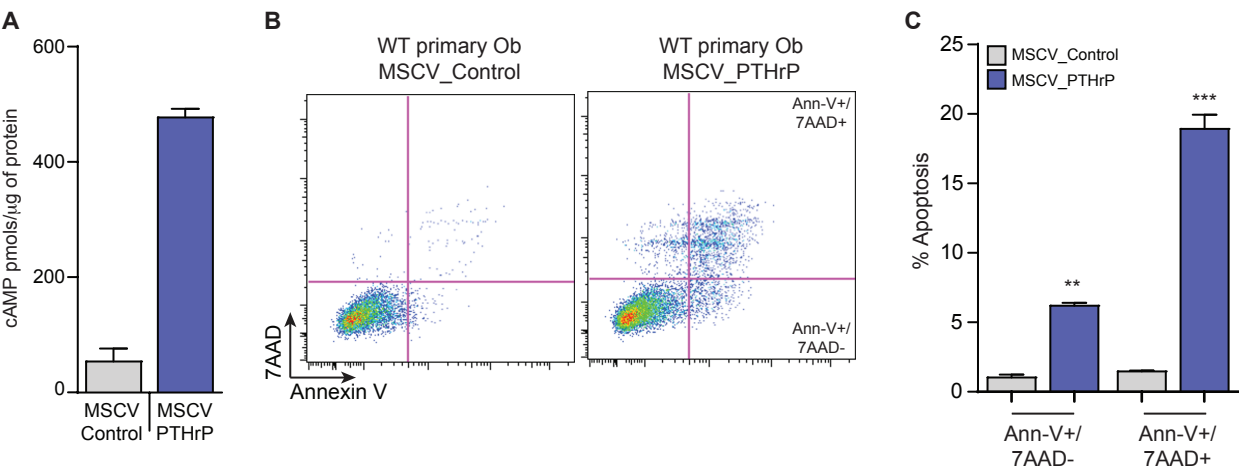

Supplement: supp [file elife-13446-supp-v1.zip]

Figure 4 - figure supplement 1 (Walia et al)

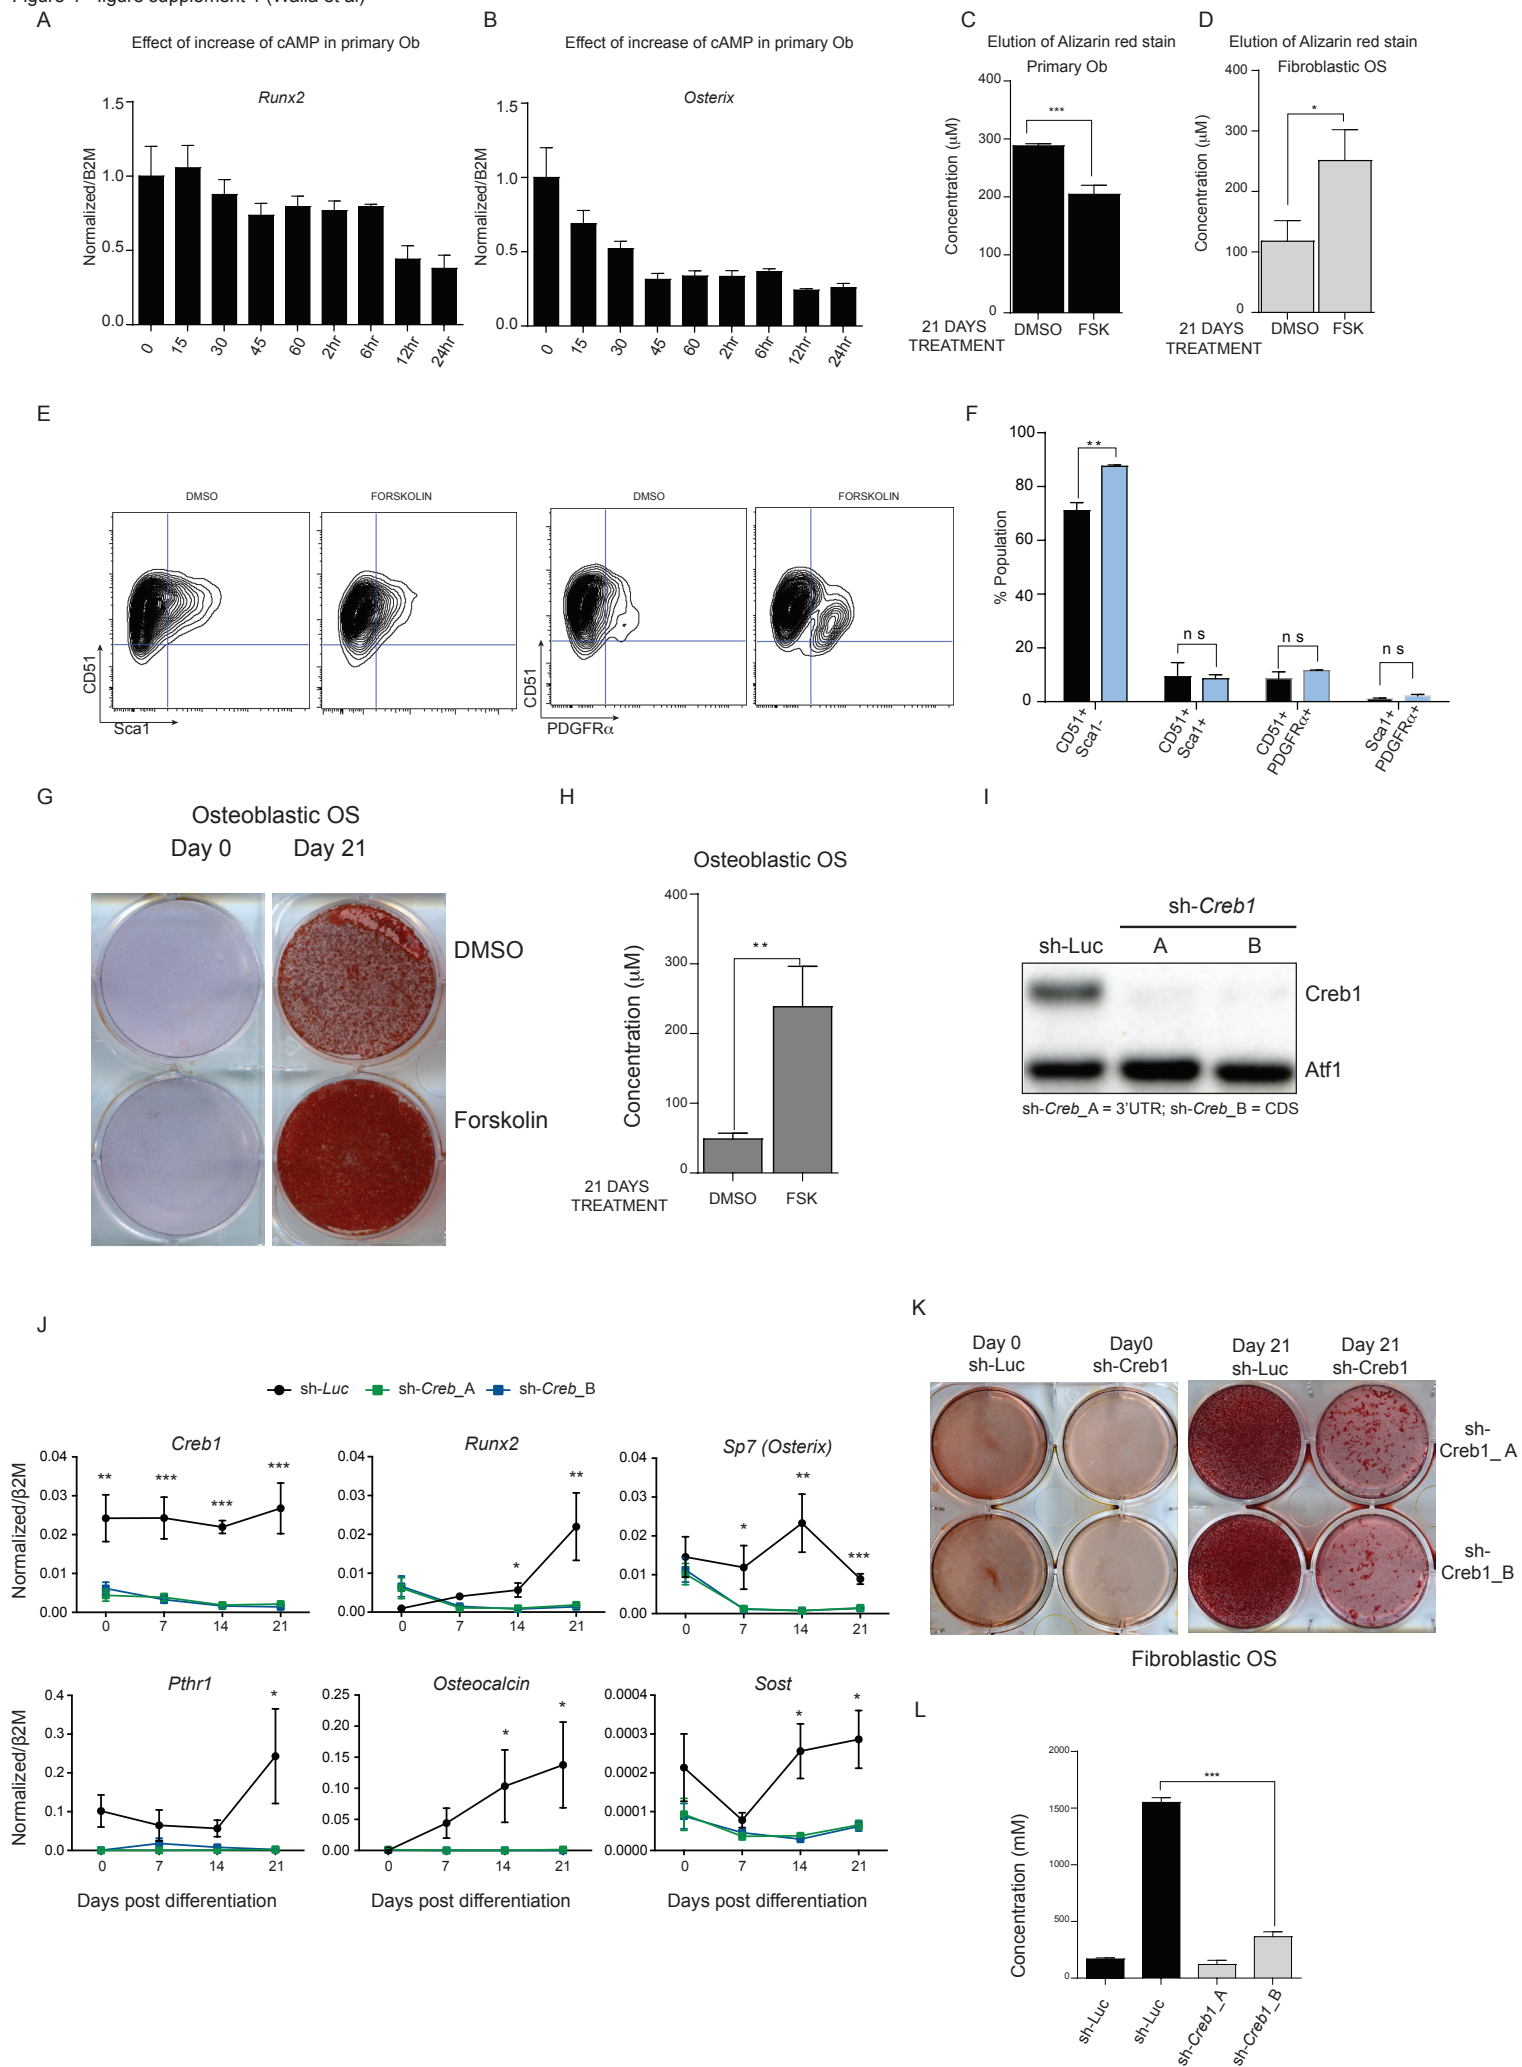

Supplement: supp [file elife-13446-supp-v1.zip]

Figure 3 - figure supplement 1 (Walia et al)

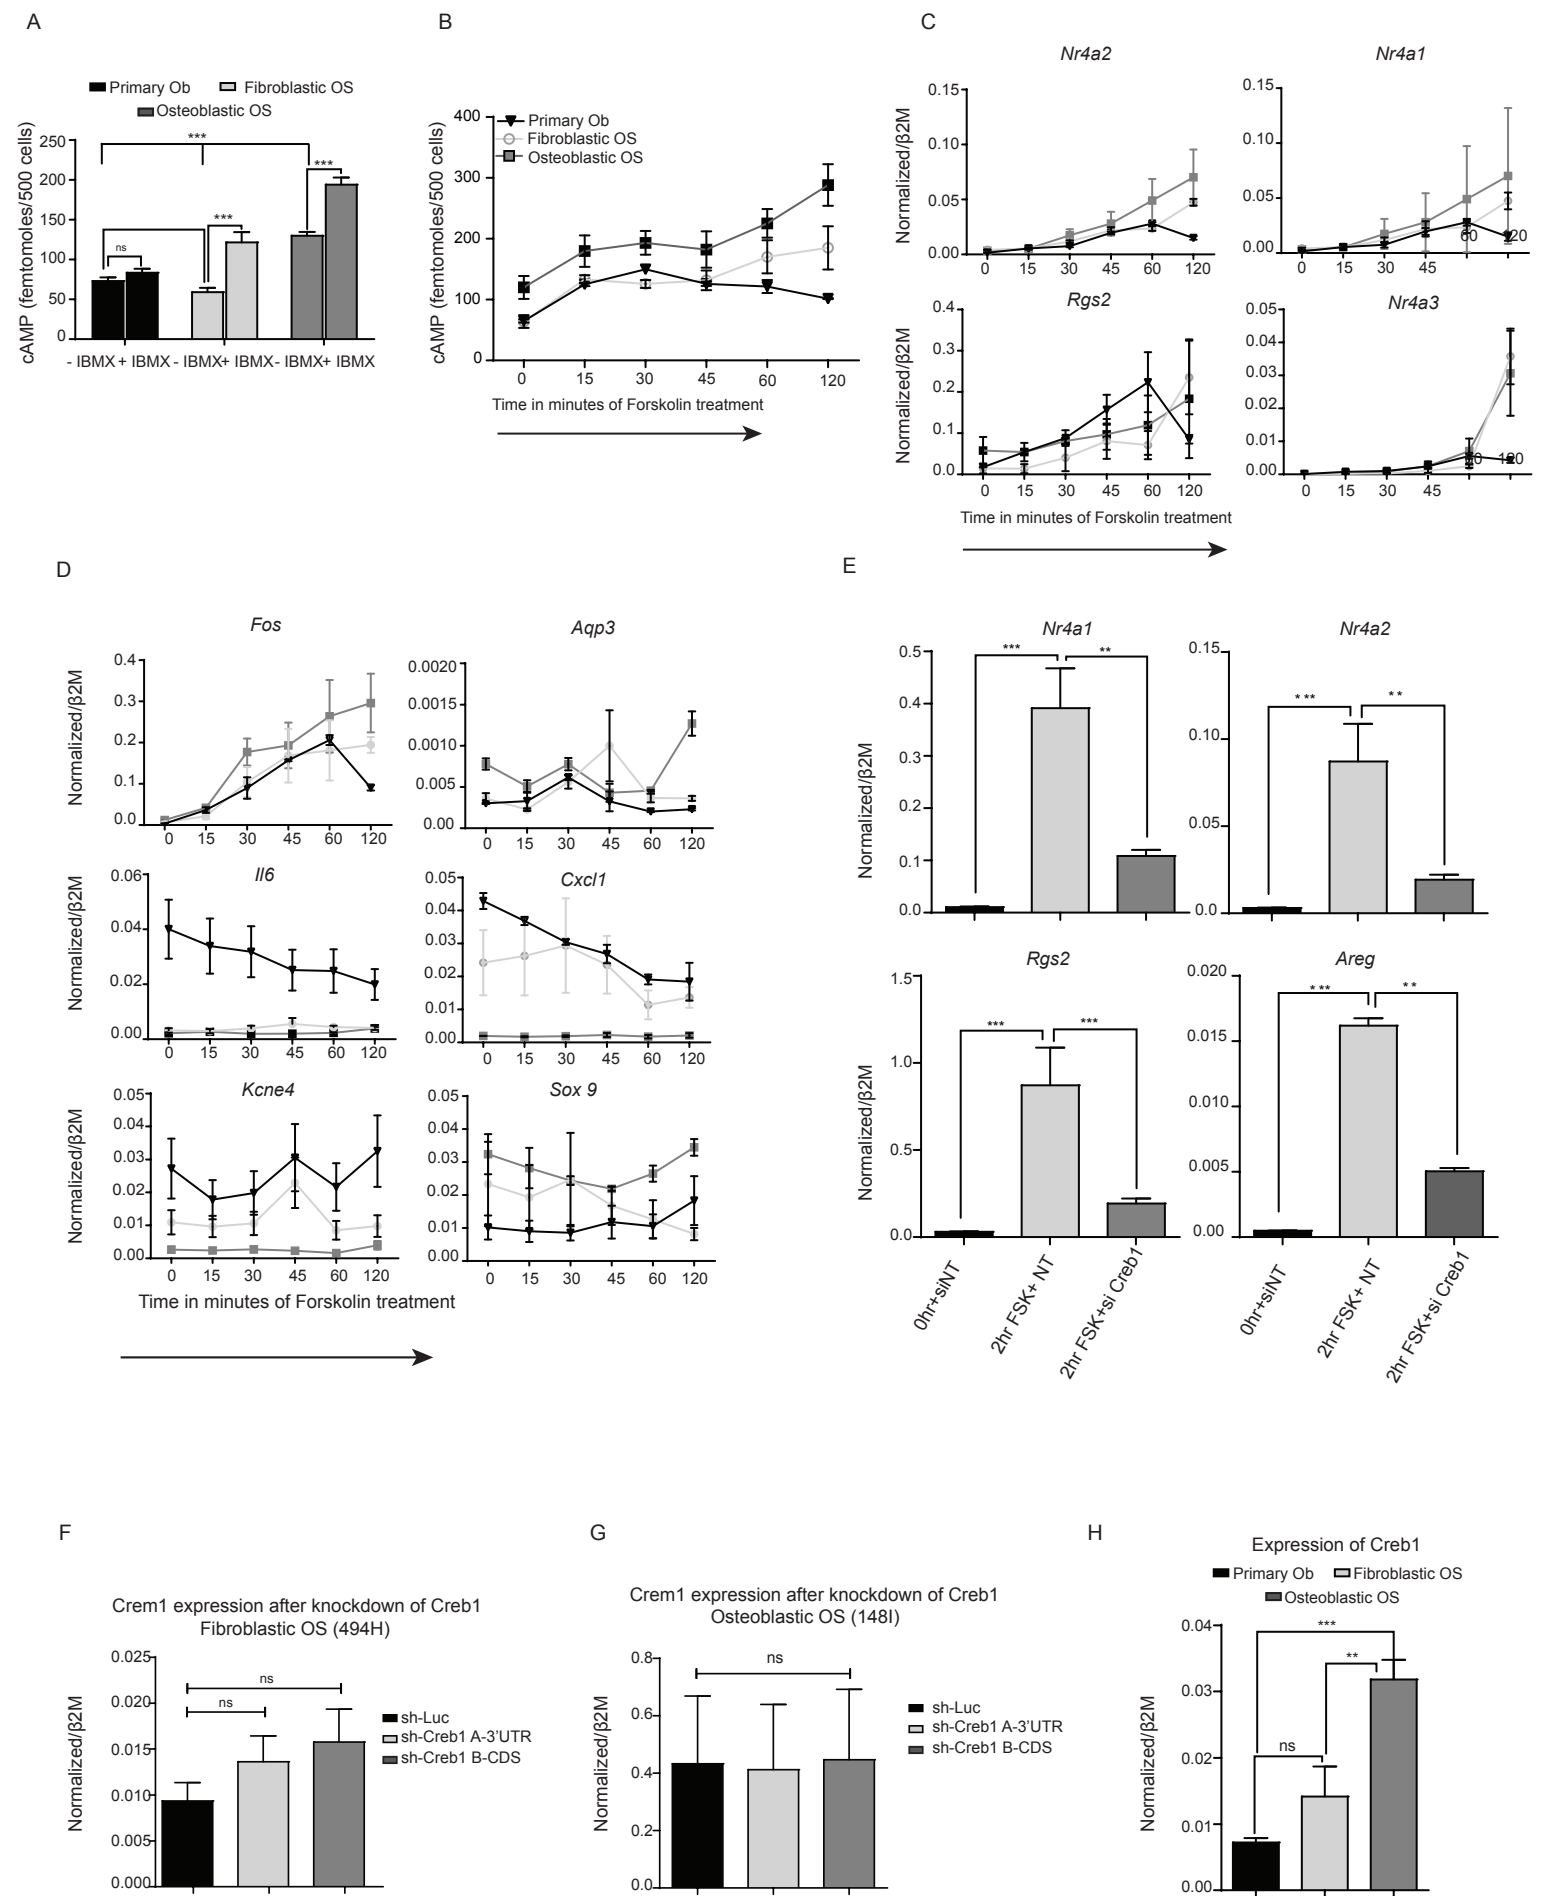

Supplement: supp [file elife-13446-supp-v1.zip]

Figure 3 - figure supplement 2 (Walia et al)

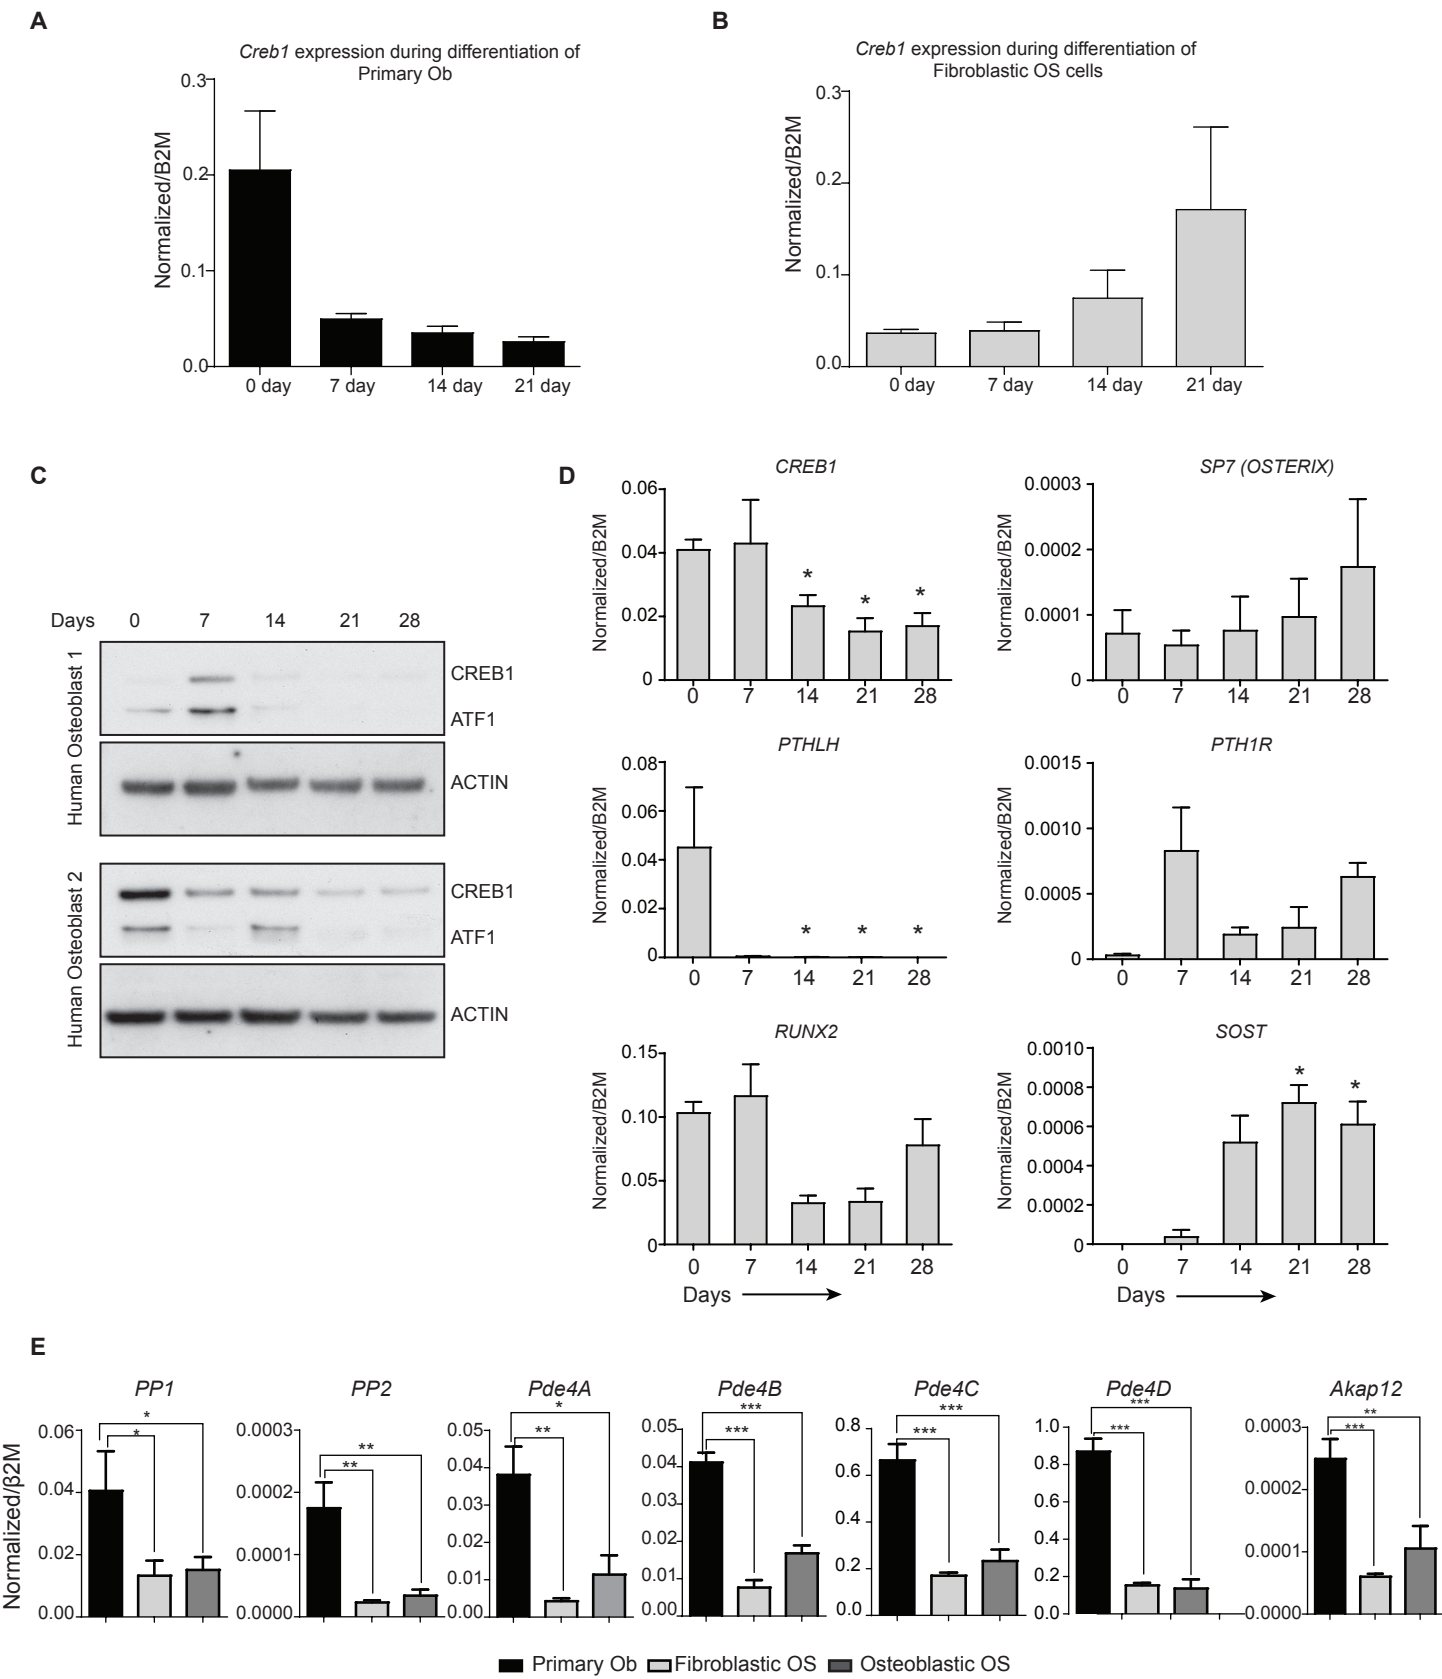

Supplement: supp [file elife-13446-supp-v1.zip]

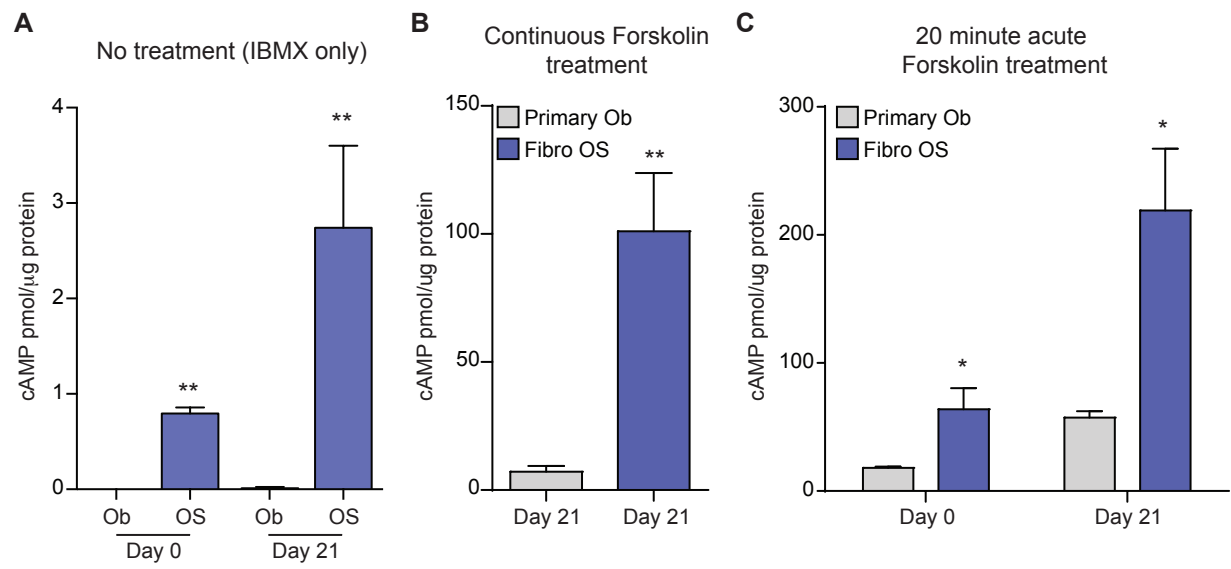

Supplement: supp [file elife-13446-supp-v1.zip]

Figure 1 - figure supplement 2 (Walia et al)

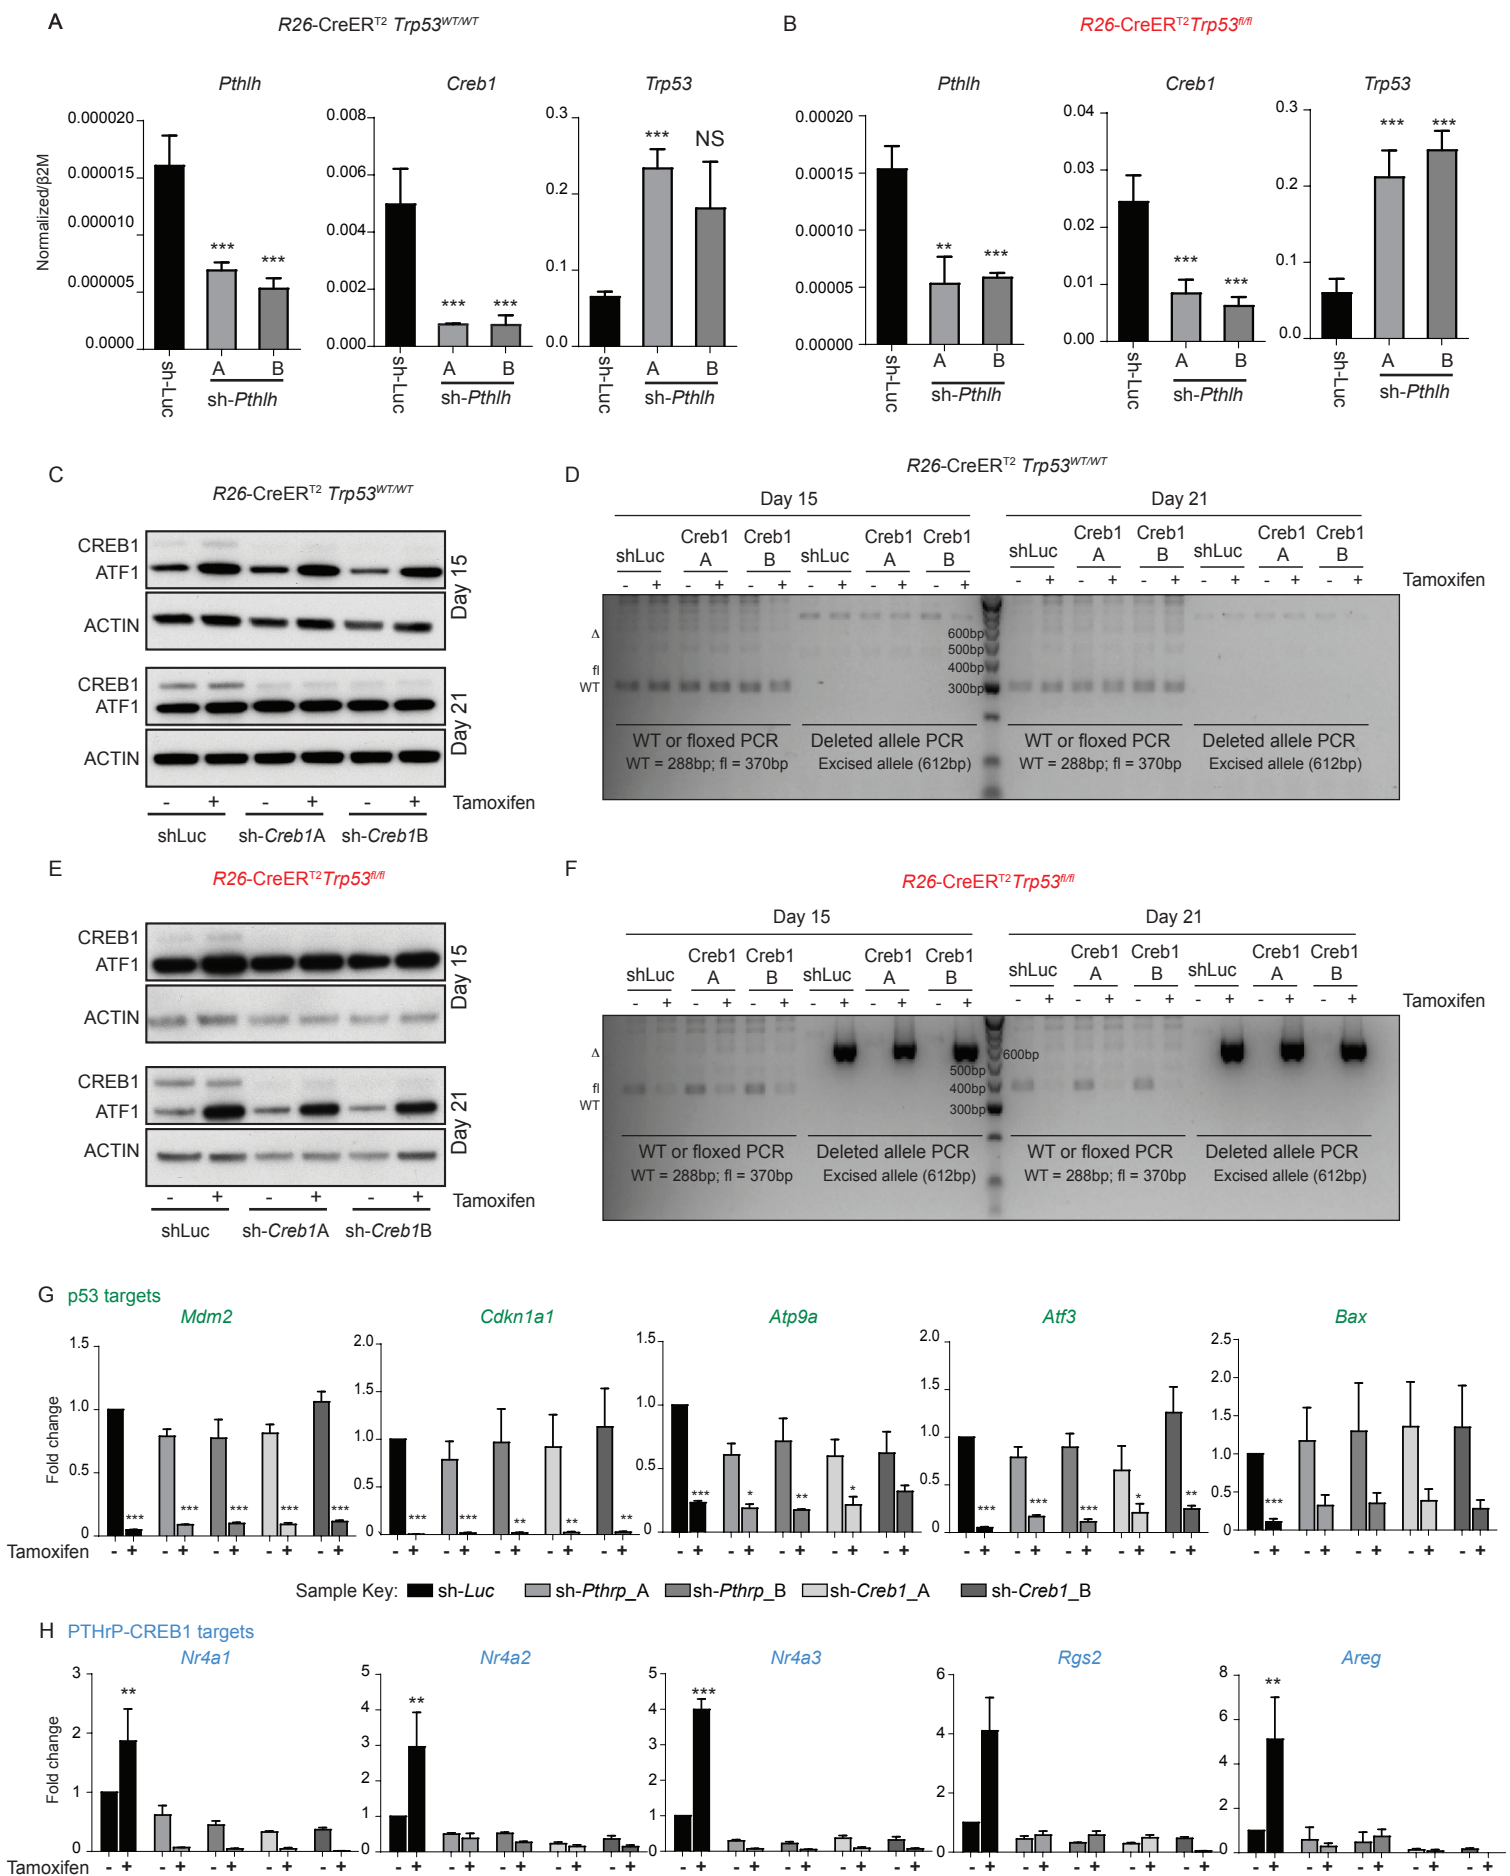

Supplement: supp [file elife-13446-supp-v1.zip]

Figure 1 - figure supplement 1 (Walia et al)

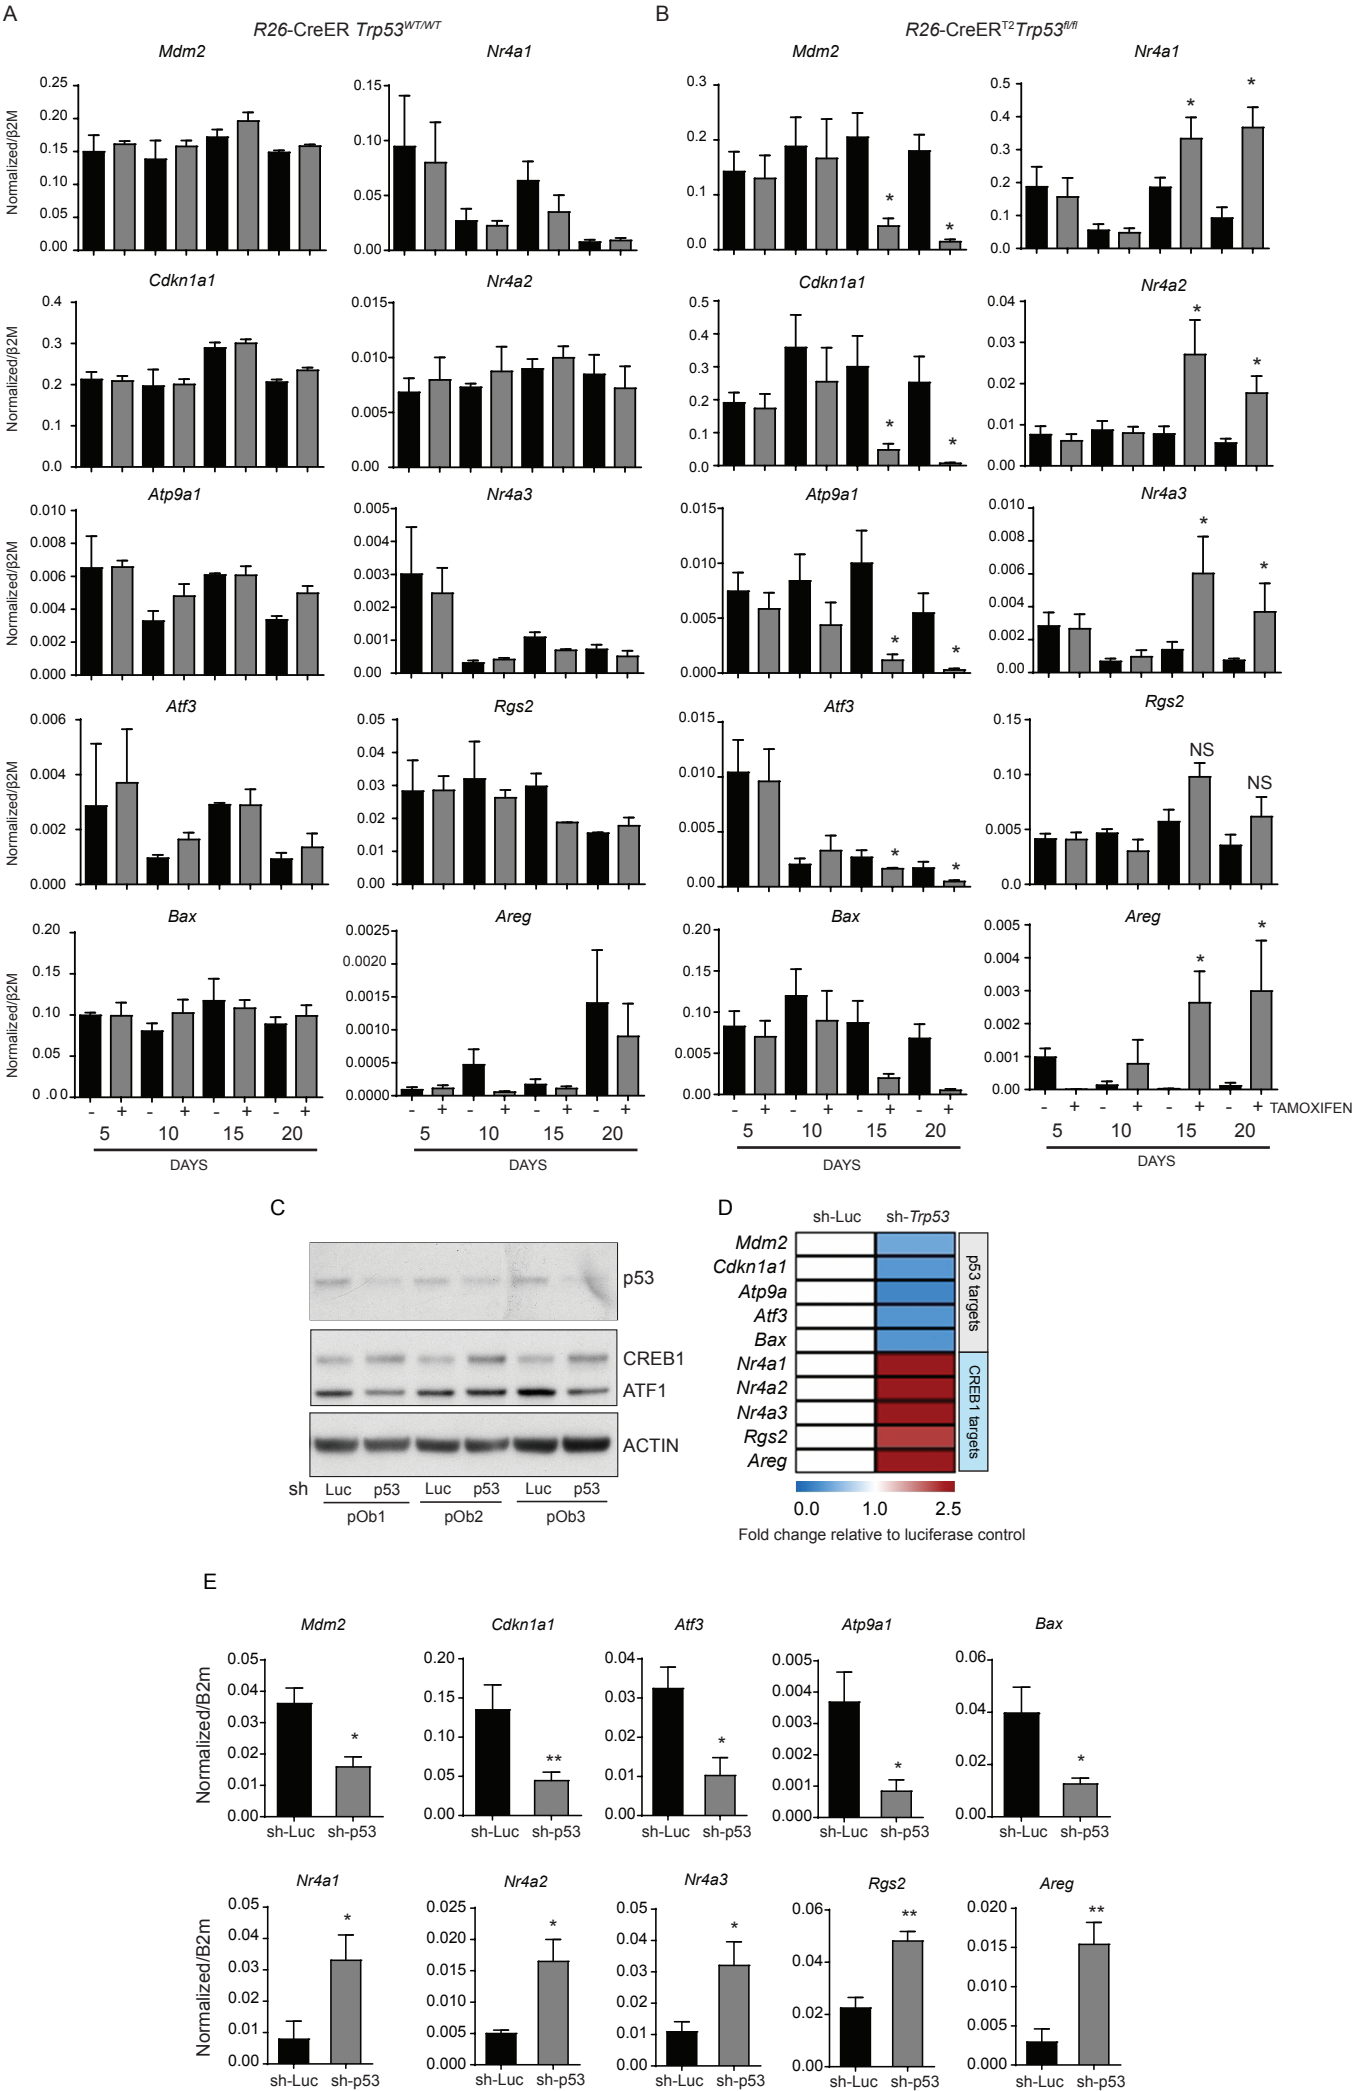

Supplement: supp [file elife-13446-supp-v1.zip]

Figure 2 - figure supplement 1 (Walia et al)

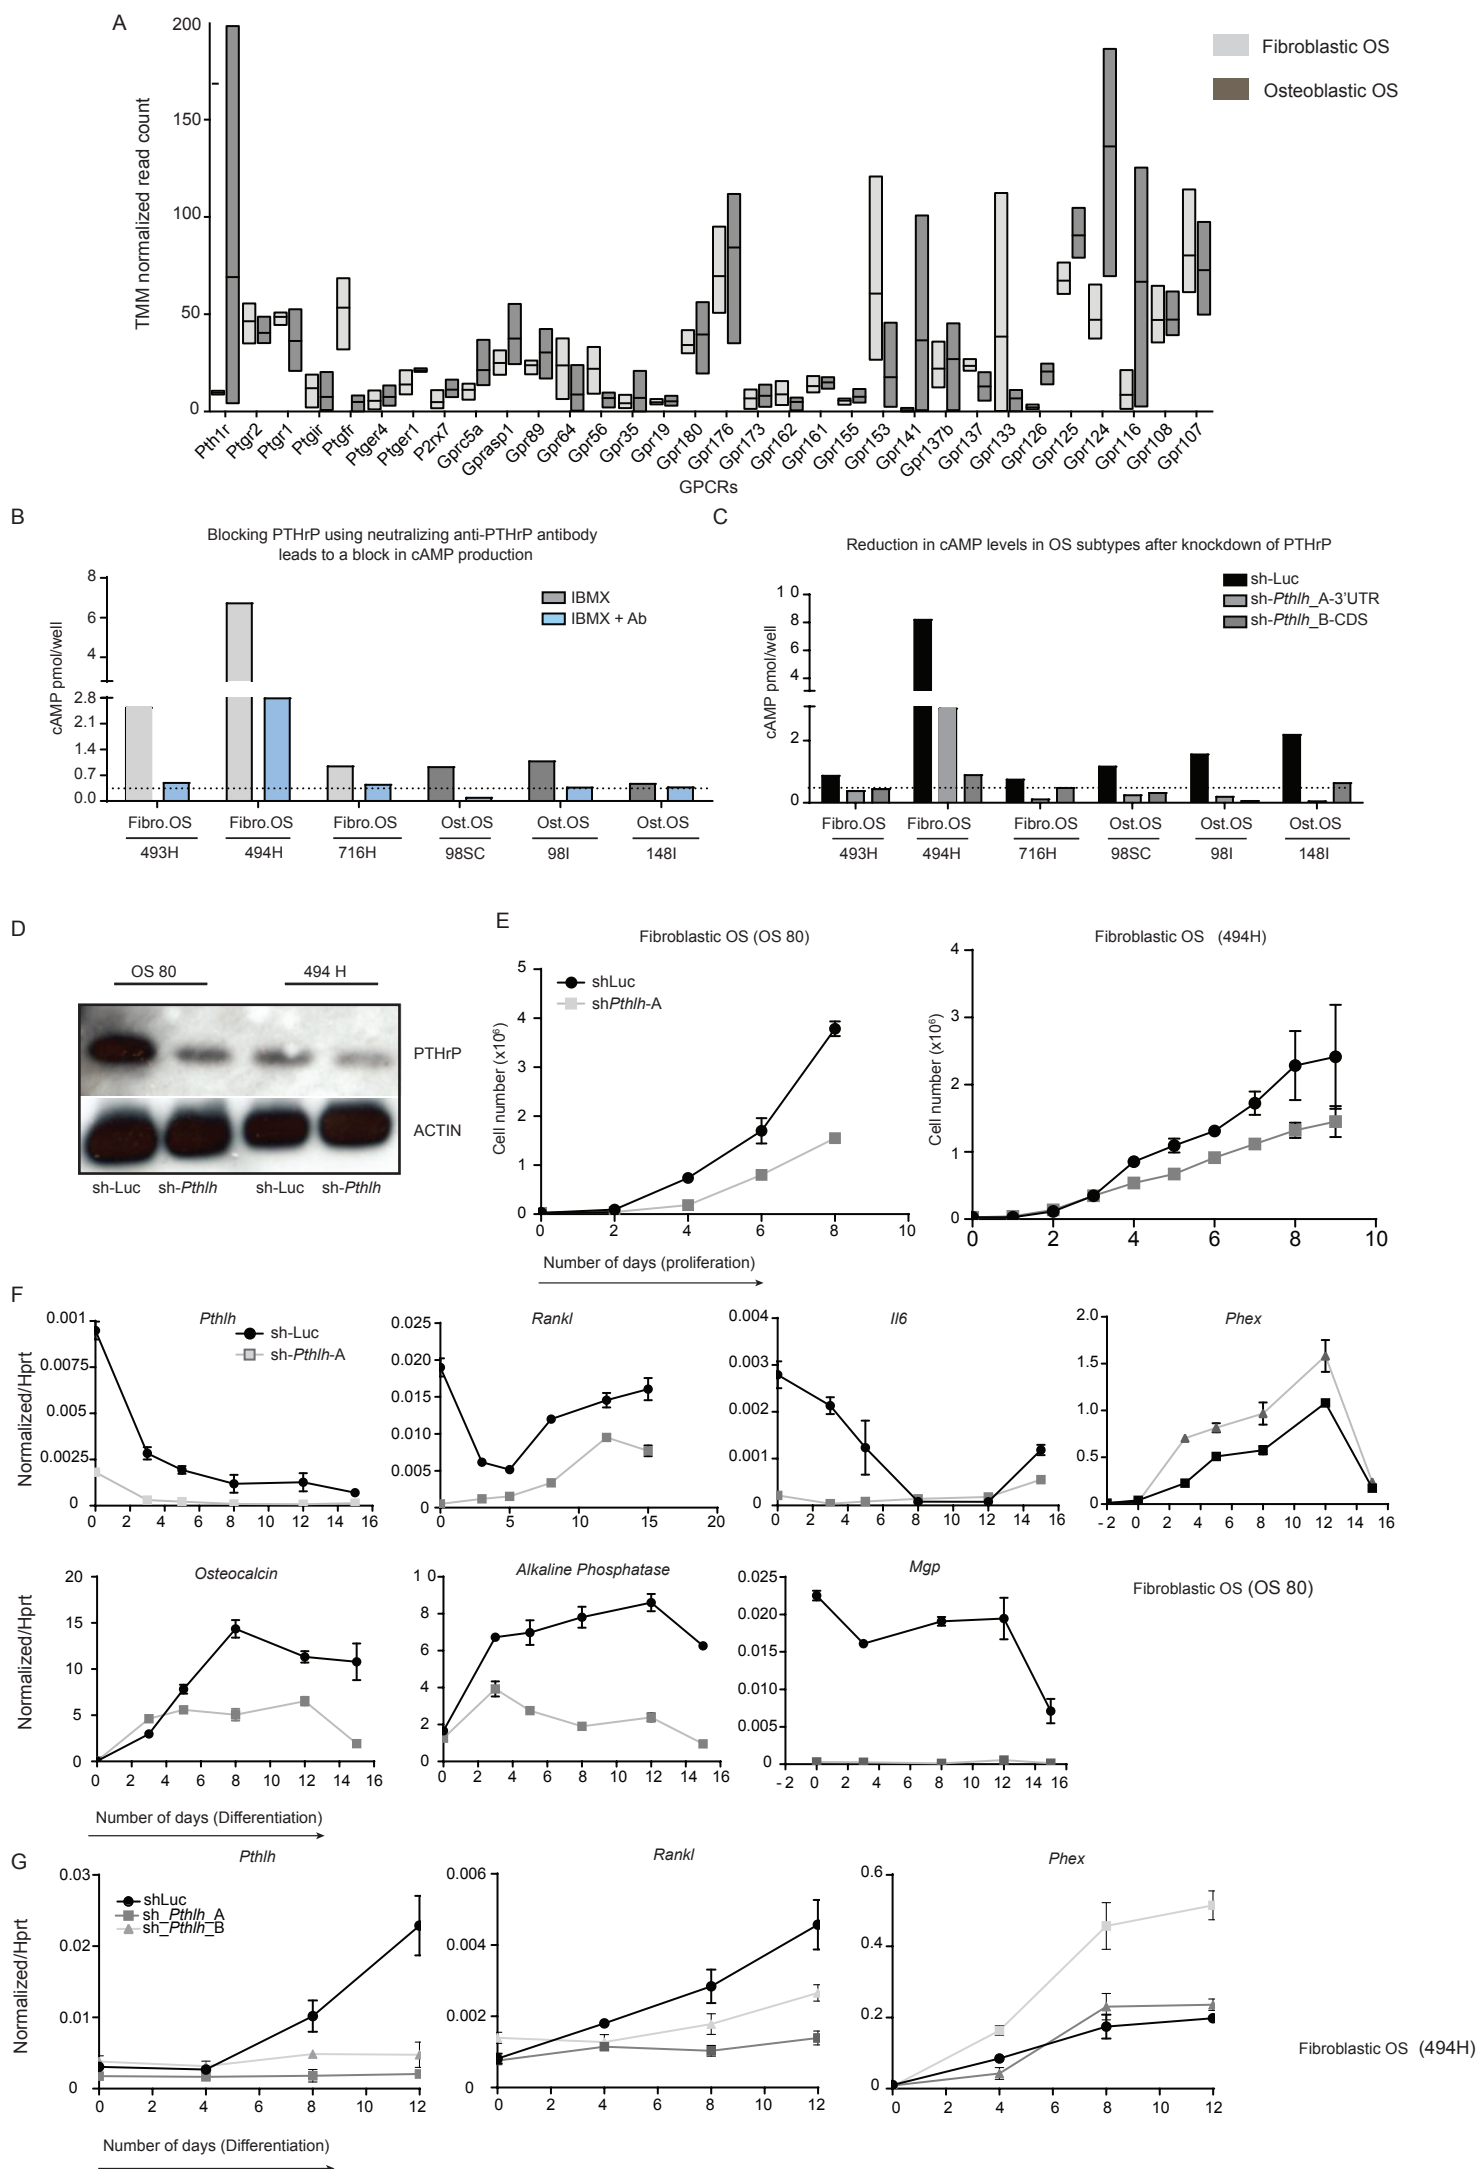

Supplement: supp [file elife-13446-supp-v1.zip]
